# Supplementary material for: Oxygen vacancy-confined CoMoO4@CoNiO2 nanorod arrays for oxygen evolution with improved performance
Source: Royal Society of Chemistry journal article supplement (doi:10.1039/c9dt01378d), 2019-01-01
Supplement: c9dt01378d1.pdf [file c9dt01378d1.pdf]

## Oxygen vacancies confined CoMoO<sub>4</sub>@CoNiO<sub>2</sub> nanorod arrays for oxygen evolution with improved performance

Xiaoqiang Du<sup>a\*</sup>, Guangyu Ma,<sup>a</sup> and Xiaoshuang Zhang,<sup>b\*</sup>

a. School of Chemical Engineering and Technology, North University of China, Taiyuan 030051, People's Republic of China. E-mail: duxq16@nuc.edu.cn

b. School of Science, North University of China, E-mail: 20160068@nuc.edu.cn

### Experimental section

#### Characterization of materials

The purity and composition of the catalyst are characterized by X-ray powder diffraction (XRD) using an Empyrean. The morphology of the catalyst is characterized by a HITACHI SU8020 Scanning electron microscopy (SEM) images, and the surface properties and valence states of the catalyst are characterized by X-ray photoelectron spectra (XPS) measurements.

#### Electrochemical measurement

Electrochemical measurements were made using a classical three-electrode system with platinum wire (OER) or graphite electrode (HER) as the counter electrode, Ag/AgCl as reference electrode and the resulting material as the working electrode. Chronoamperometric was acted to a method to study their stability for OER and HER. The faradic efficiency (FE) was calculated as the ratio between the quantity of oxygen or hydrogen production for theoretical and experimental.

**DFT computation details:** The DFT calculations were performed using the Cambridge Sequential Total Energy Package (CASTEP) with the plane-wave pseudo-potential method. The geometrical structures of the (111) plane of NiCoO<sub>2</sub> were optimized by the generalized gradient approximation (GGA) methods. The Revised Perdew-Burke-Ernzerh of (RPBE) functional was used to treat the electron exchange correlation interactions. A Monkhorst Pack grid k-points of 3×3×2 and a plane-wave basis set cut-off energy of 400 eV were used for integration of the Brillouin zone. The structures were optimized for energy and force convergence set at 0.03 eV/Å and 1.0×10<sup>-5</sup> eV, respectively. A self-consistence field of 2.0×10<sup>-6</sup> eV/atom was applied. A vacuum space as large as 15.0 Å was used to avoid periodic interactions. The free energy ( $\Delta G_{H^*}$ ) for hydrogen absorption was computed as;

$$\Delta G_{H^*} = E_{\text{total}} + E_{\text{surf}} - 1/2E_{\text{H}_2} + \Delta \text{ZPE} - T\Delta S$$

The symbols represent the total energy ( $E_{\text{total}}$ ) for adsorbed state, energy of pure state ( $E_{\text{surf}}$ ), the change in zero-point energy ( $\Delta E_{\text{ZPE}}$ ), Temperature (T), and the entropy change ( $\Delta S$ ), respectively. It is estimated that the vibrational entropy of hydrogen in the adsorbed state is negligible such that  $\Delta S_H \approx \Delta_{H^*} - 1/2(S_{\text{H}_2}) \approx -1/2(S_{\text{H}_2})$ , where  $S_{\text{H}_2}$  is the entropy of H<sub>2(g)</sub> at standard conditions and  $TS_{(\text{H}_2)}$  is given as about 0.41 eV for H<sub>2</sub> at 300 K and 1 atm.

**Theoretical models:** The correlative models are constructed to simulate CoMoO<sub>4</sub>@CoNiO<sub>2</sub>/O<sub>2</sub> and composite CoMoO<sub>4</sub>@CoNiO<sub>2</sub>/Ar catalyst. Typically, the (111) facet of CoNiO<sub>2</sub> was modeled by the slab with layers of Ni-O atoms terminated by H-atoms, and the (111) facet was adopted to create the CoNiO<sub>2</sub> slab.

N<sub>2</sub> adsorption for Brunauer - Emmett - Teller (BET) surface area determination: Nitrogen adsorption/desorption at T=77K was performed with a Micromeritics ASAP 2020M system. Sample was used for adsorption analysis after pretreatment at T=80°C for t=8.0h under vacuum conditions and the sample was kept in an N<sub>2</sub> atmosphere until N<sub>2</sub>-adsorption measurements were performed. Surface areas were calculated from the adsorption data by using Langmuir and BET

methods

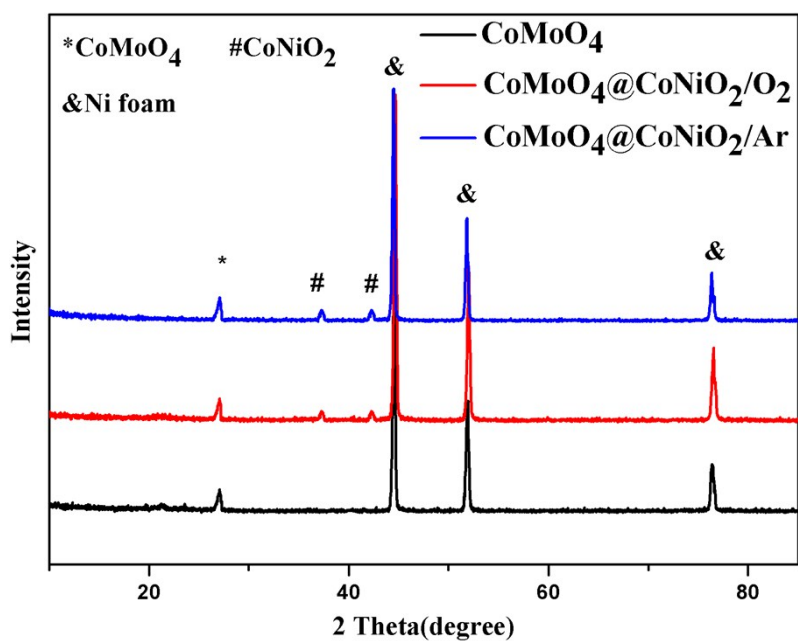

**Fig. S1** XRD of CoMoO<sub>4</sub>, CoMoO<sub>4</sub>@CoNiO<sub>2</sub>/O<sub>2</sub> and CoMoO<sub>4</sub>@CoNiO<sub>2</sub>/Ar.

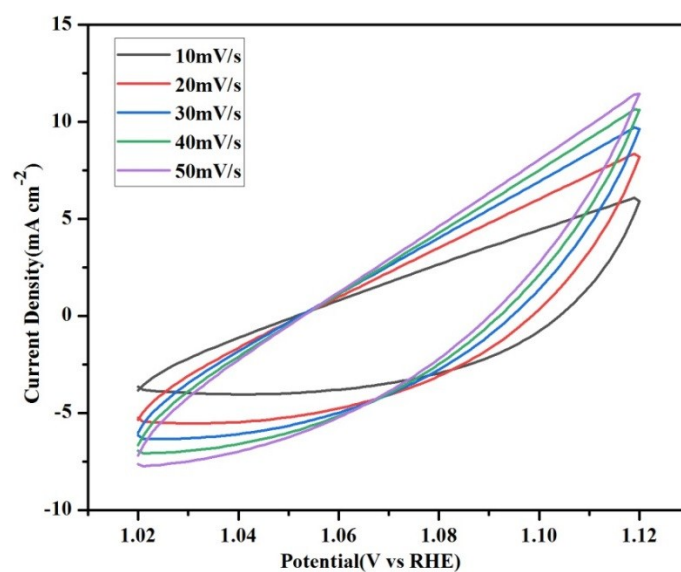

**Fig. S2** CVs of CoMoO<sub>4</sub> with different scan rates (10-50 mV s<sup>-1</sup>) in the region of 1.02-1.12V vs RHE.

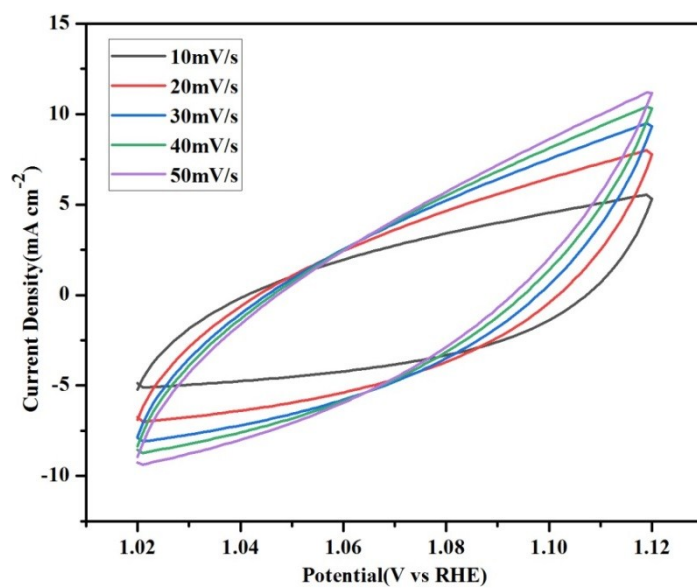

**Fig. S3** CV<sub>s</sub> of CoMoO<sub>4</sub>@CoNiO<sub>2</sub>/O<sub>2</sub> with different scan rates (10-50 mV s<sup>-1</sup>) in the region of 1.02-1.12V vs RHE.

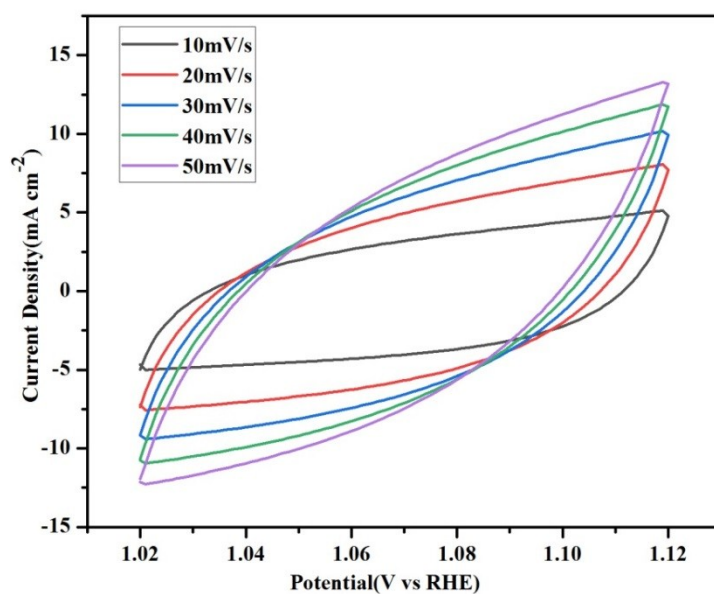

**Fig. S4** CV<sub>s</sub> of CoMoO<sub>4</sub>@CoNiO<sub>2</sub>/Ar with different scan rates (10-50 mV s<sup>-1</sup>) in the region of 1.02-1.12V vs RHE.

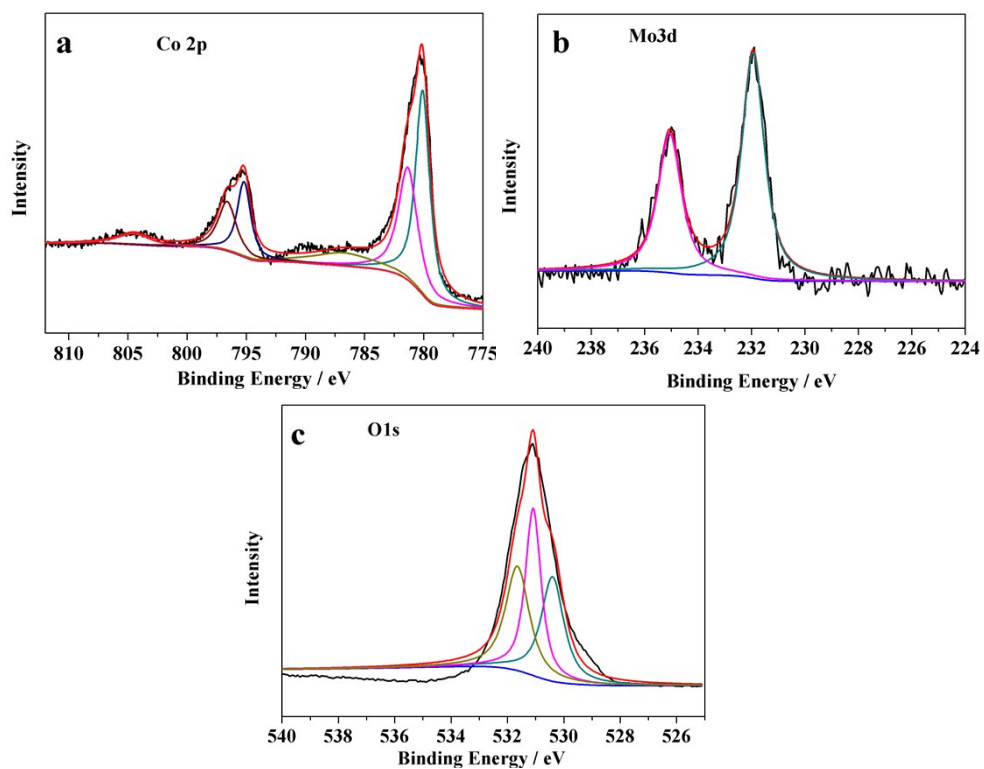

**Fig.S5** XPS of (a) Co 2p, (b) Mo 3d and (c) O 1s of CoMoO<sub>4</sub>.

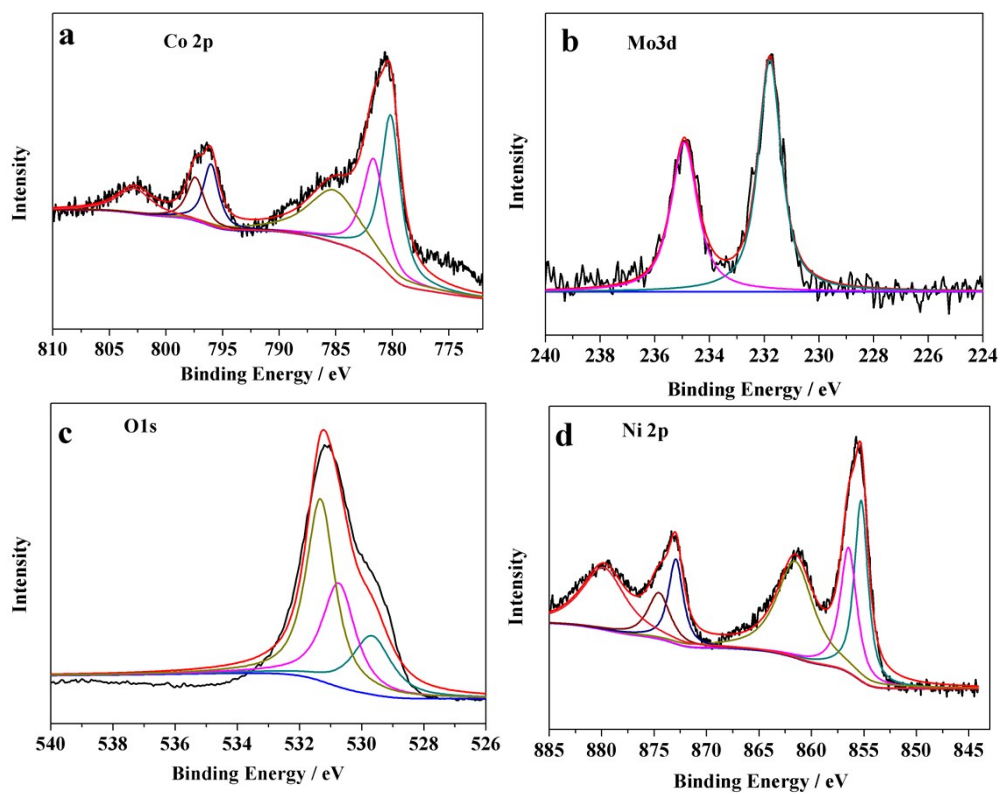

**Fig.S6** XPS of (a) Co 2p, (b) Mo 3d, (c) O 1s and (d) Ni 2p of CoMoO<sub>4</sub>@CoNiO<sub>2</sub>/O<sub>2</sub>.

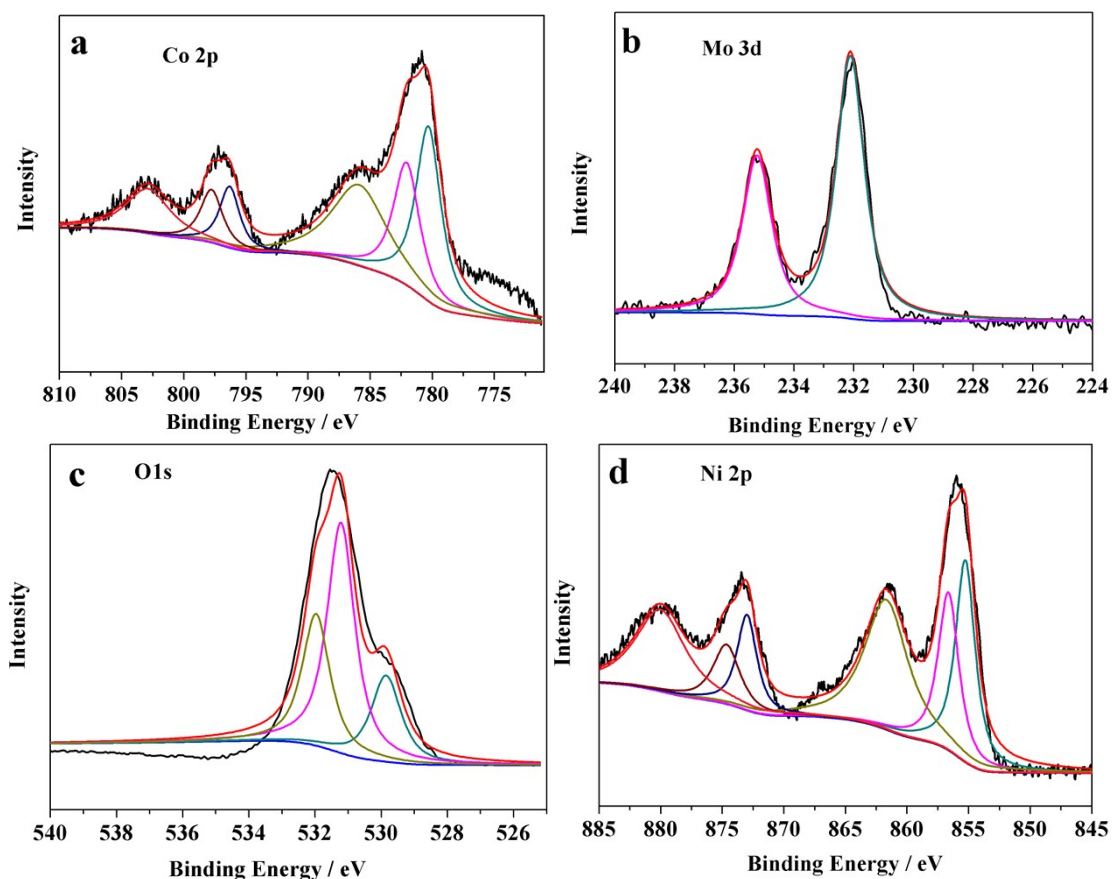

**Fig.S7** XPS of (a) Co 2p, (b) Mo 3d, (c) O 1s and (d) Ni 2p of CoMoO<sub>4</sub>@CoNiO<sub>2</sub>/Ar.

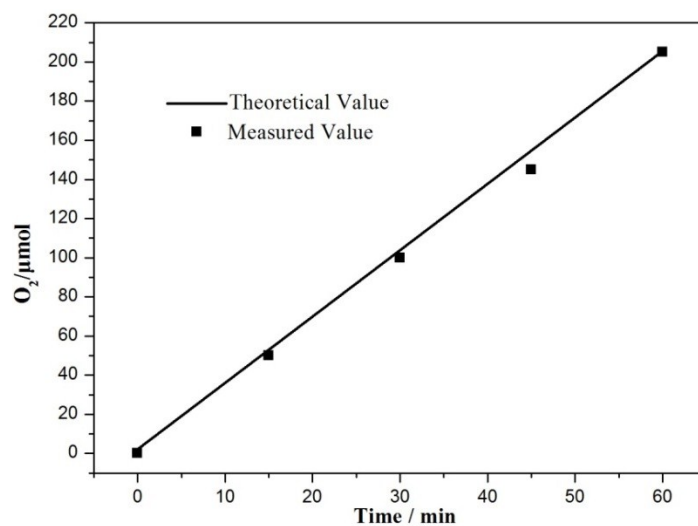

**Fig. S8** Electrocatalytic efficiency of O<sub>2</sub> production over CoMoO<sub>4</sub>@CoNiO<sub>2</sub>/Ar at a potential of ca. 1.50 V, measured for 60 min.

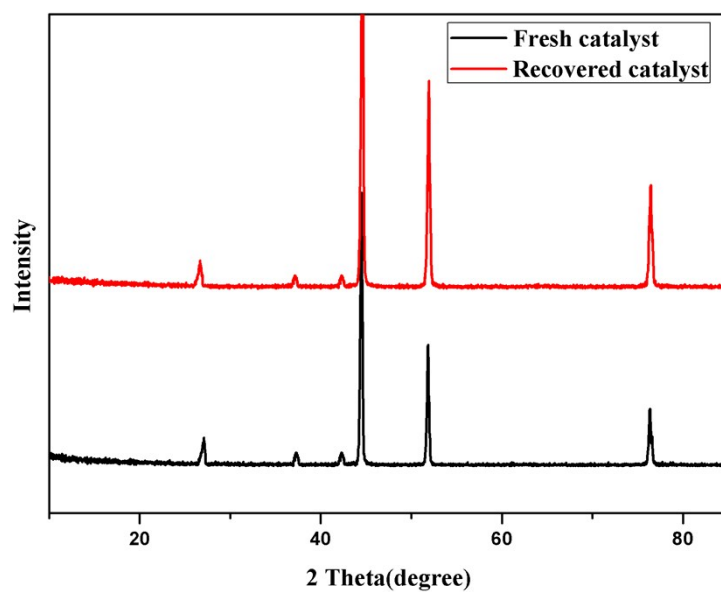

**Fig.S9** XRD of fresh (a) and recovered (b)  $\text{CoMoO}_4/\text{CoNiO}_2/\text{Ar}$ .

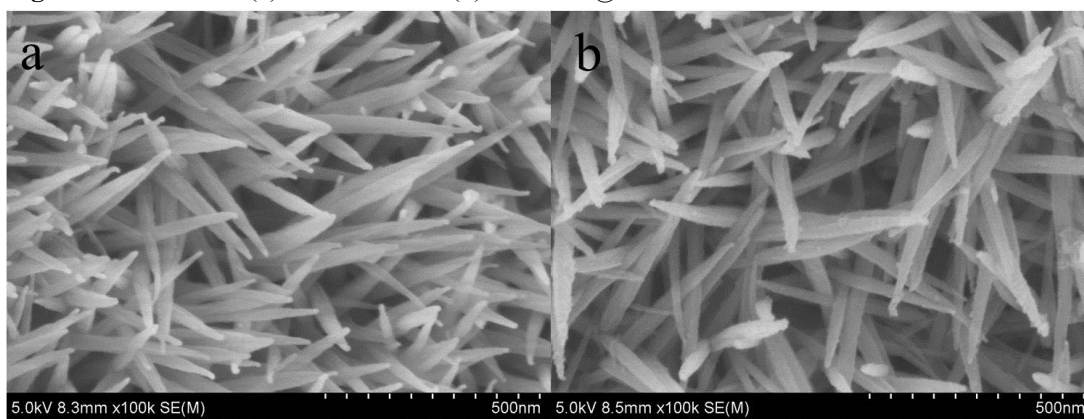

**Fig.S10** SEM of fresh (a) and recovered (b)  $\text{CoMoO}_4/\text{CoNiO}_2/\text{Ar}$ .

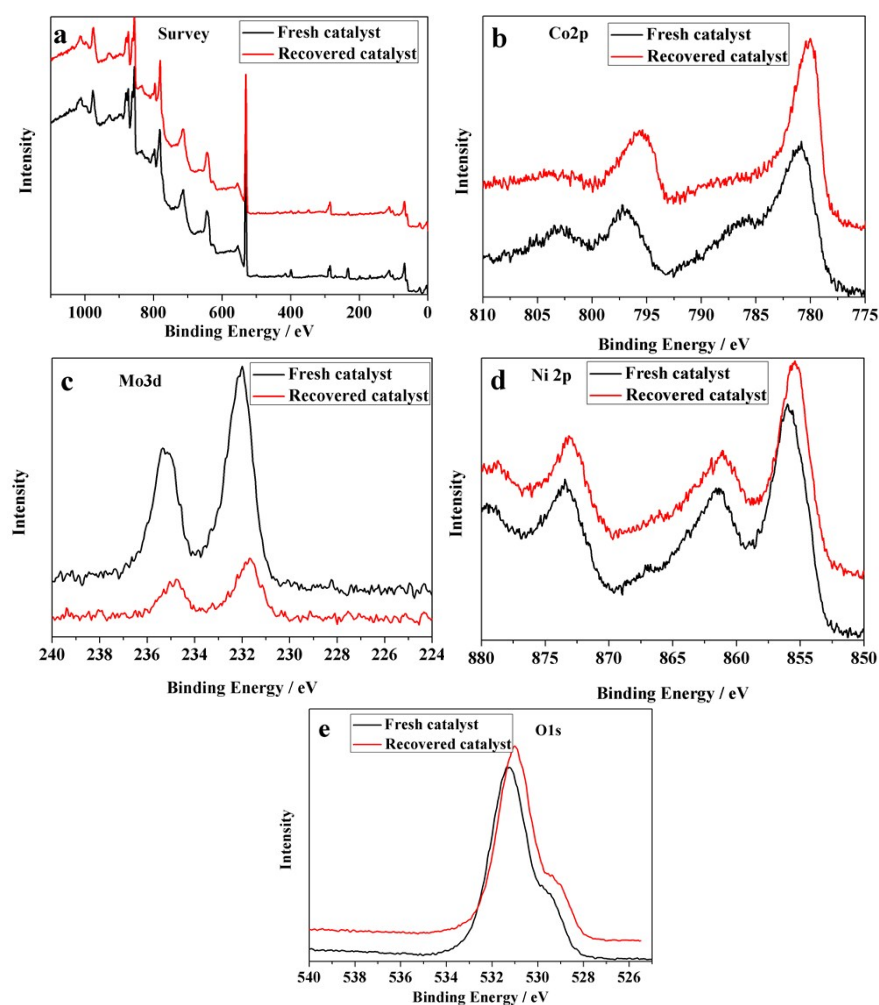

**Fig.S11** XPS of (a) survey scan, (b) Co 2p, (c) Mo 3d, (d) Ni 2p and (e) O 1s of fresh and recovered  $\text{CoMoO}_4@\text{CoNiO}_2/\text{Ar}$ .

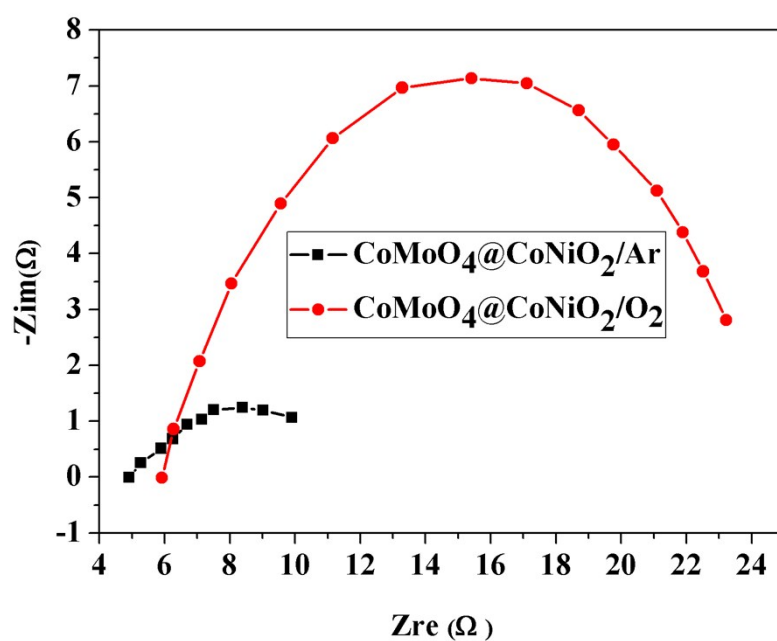

**Fig.S12** Nyquist plots of samples.

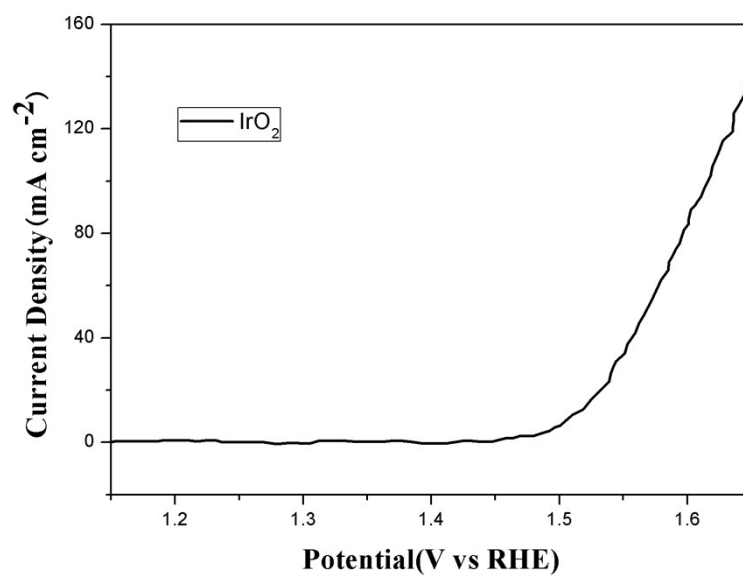

**Fig. S13** OER curves of  $\text{IrO}_2$  in 1.0 M KOH.

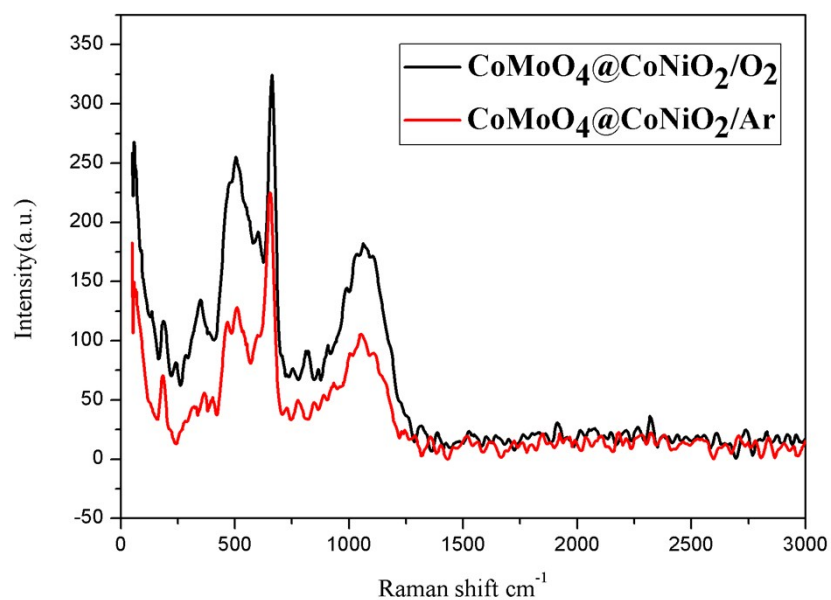

**Figure S14.** Raman spectrum of  $\text{CoMoO}_4@ \text{CoNiO}_2$  excited by 514.5 nm laser.



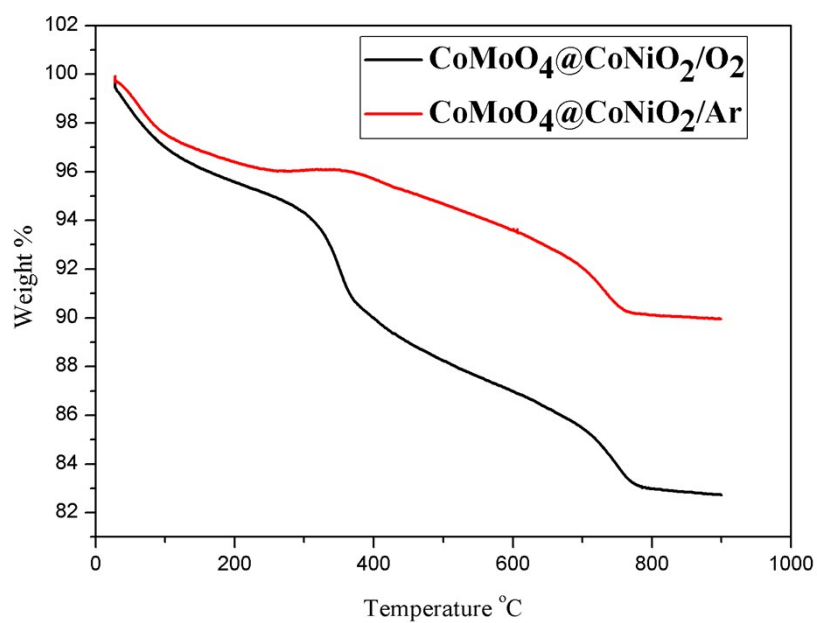

**Figure S15.** Thermogravimetric analysis of  $\text{CoMoO}_4@\text{CoNiO}_2/\text{O}_2$  and  $\text{CoMoO}_4@\text{CoNiO}_2/\text{Ar}$ .

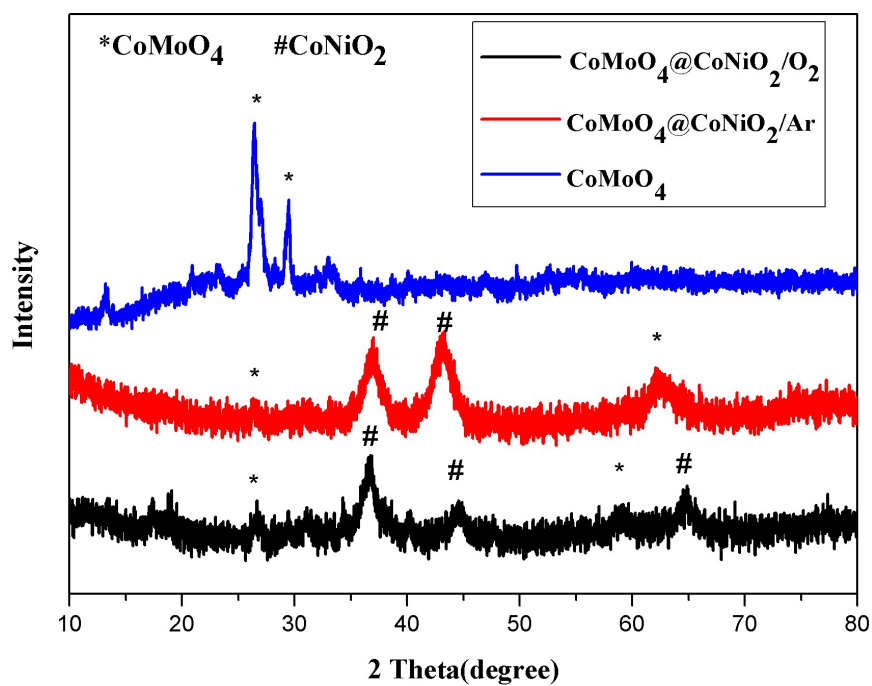

**Fig. S16** XRD of  $\text{CoMoO}_4$ ,  $\text{CoMoO}_4@\text{CoNiO}_2/\text{O}_2$  and  $\text{CoMoO}_4@\text{CoNiO}_2/\text{Ar}$ . (The oxides have been physically separated from the support)
